# Supplementary material for: Longitudinal associations of active commuting with body mass index
Source: PubMed Central journal article supplement (PMC5023394; doi:10.1016/j.ypmed.2016.06.014), 2016-09
Supplement: mmc1.pdf [file mmc1.pdf]

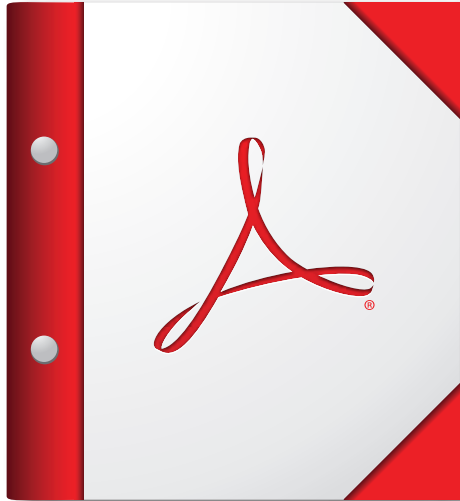

**For the best experience, open this PDF portfolio in  
Acrobat 9 or Adobe Reader 9, or later.**

[Get Adobe Reader Now!](#)
